# Supplementary material for: Study to Investigate the Knowledge of Rare Diseases among Dentists, Orthodontists, Periodontists, Oral Surgeons and Craniomaxillofacial Surgeons
Source: MDPI journal article supplement (doi:10.3390/ijerph18010139), 2020-12-28
Supplement: s1 [file s1]

# **Studie zur Untersuchung der Kenntnis zu Seltenen Erkrankungen unter Zahnärzten, Fachzahnärzten und MKG-Chirurgen**

## **Fragebogen**

1. Allgemeine Informationen
2. Kenntnisse zu seltenen Erkrankungen
3. Konfrontation/Auseinandersetzung mit seltenen Erkrankungen
4. Ausbildung und Fort-/Weiterbildung
5. Informationen zu seltenen Erkrankungen

## 1. Allgemeine Informationen

### Geschlecht

- ☐ weiblich
- ☐ männlich

### Alter

- ☐ < 30 Jahre
- ☐ 30-40 Jahre
- ☐ 41-50 Jahre
- ☐ 51-60 Jahre
- ☐ > 60 Jahre

### Wie lange sind Sie im Beruf?

- ☐ < 5 Jahre
- ☐ 5-10 Jahre
- ☐ 11-15 Jahre
- ☐ 16-20 Jahre
- ☐ > 20 Jahre

### Sie sind?

- ☐ Zahnarzt/-ärztin ohne Zusatzbezeichnung/-qualifikation
- ☐ Zahnarzt/-ärztin mit Zusatzbezeichnung/-qualifikation
  - ☐ Oralchirurgie
  - ☐ Mund-Kiefer-Gesichtschirurgie
  - ☐ Kieferorthopädie
  - ☐ Andere: \_\_\_\_\_

### An welcher Universität haben Sie studiert?

- ☐ TH Aachen
- ☐ Charité - Universitätsmedizin Berlin
- ☐ Universität Bonn
- ☐ TU Dresden
- ☐ Universität Düsseldorf
- ☐ Universität Erlangen-Nürnberg
- ☐ Universität Frankfurt
- ☐ Universität Freiburg
- ☐ Universität Gießen
- ☐ Universität Göttingen
- ☐ Universität Greifswald
- ☐ Universität Halle-Wittenberg
- ☐ Universität Hamburg
- ☐ Universität Hannover
- ☐ Universität Heidelberg
- ☐ Universität Jena
- ☐ Universität Kiel
- ☐ Universität Köln
- ☐ Universität Leipzig
- ☐ Universität Mainz
- ☐ Universität Marburg

- ☐ Universität München (LMU)
- ☐ Universität Münster
- ☐ Universität Regensburg
- ☐ Universität Rostock
- ☐ Universität des Saarlandes
- ☐ Universität Tübingen
- ☐ Universität Ulm
- ☐ Universität Würzburg
- ☐ Universität Witten-Herdecke
- ☐ Andere: \_\_\_\_\_

**Den Großteil Ihrer Zeit arbeiten Sie?**

- ☐ in einem Universitätsklinikum
- ☐ in einer Privatklinik
- ☐ selbstständig in einer Praxis
- ☐ in einer Gemeinschaftspraxis
- ☐ in einem Medizinischen Versorgungszentrum
- ☐ an einem anderen Ort: \_\_\_\_\_

## 2. Kenntnisse zu seltenen Erkrankungen

### Wie schätzen Sie Ihre Kenntnisse zu seltenen Erkrankungen ein?

Versuchen Sie, so spontan und intuitiv wie möglich zu antworten.

>-----<

sehr gut ungenügend

### Ihrer Meinung nach ist eine seltene Erkrankung...

- ☐ Ich weiß nicht genau, was eine seltene Erkrankung ist.
- ☐ eine lebensgefährliche chronische Erkrankung, die häufig genetisch bedingt und schwer heilbar ist.
- ☐ eine Erkrankung, von der nicht mehr als 5 von 10.000 Menschen in der EU betroffen sind.
- ☐ eine Erkrankung, von der nicht mehr als 5 von 250.000 Menschen in der EU betroffen sind.

### Wie viel Prozent der seltenen Erkrankungen manifestieren sich im Mund-Kiefer-Gesichtsbereich?

- ☐ 5%
- ☐ 7,5%
- ☐ 12%
- ☐ 15%
- ☐ 32%

### Welche Thesen zu seltenen Erkrankungen sind Ihrer Meinung nach korrekt?

Mehrere Antworten sind möglich.

- ☐ Seltene Erkrankungen sind oft chronische Erkrankungen.
- ☐ Der Großteil der seltenen Erkrankungen ist heilbar.
- ☐ Zur Therapie der seltenen Erkrankungen müssen spezielle Arzneimittel entwickelt werden.
- ☐ Es sind 6.000-8.000 seltene Erkrankungen bekannt.
- ☐ Es sind 8.000-12.000 seltene Erkrankungen bekannt.
- ☐ Der Großteil der seltenen Erkrankungen ist genetisch (mit-)bedingt.
- ☐ Seltene Erkrankungen sind nicht vererbbar.
- ☐ Seltene Erkrankungen manifestieren sich vor allem im frühen Kindesalter.
- ☐ In Deutschland leidet etwa jeder 20. Bundesbürger unter einer seltenen Erkrankung.
- ☐ In der Europäischen Union leiden ca. 30 Millionen Menschen unter einer seltenen Erkrankung.
- ☐ ich enthalte mich
- ☐ Andere: \_\_\_\_\_

### Welche der nachfolgend genannten seltenen Erkrankungen, die sich orofazial manifestieren können, kennen Sie?

- ☐ Down-Syndrom
- ☐ Ehlers-Danlos-Syndrom
- ☐ Ektodermale Dysplasie
- ☐ Epidermolysis bullosa
- ☐ Fetales Alkoholsyndrom
- ☐ Gorlin-Goltz Syndrom
- ☐ Morbus Behcet
- ☐ Morbus Crohn
- ☐ Osteogenesis imperfecta
- ☐ Pemphigoid
- ☐ Pemphigus vulgaris

- Sklerodermie
- Von-Willebrand-Jürgens Syndrom
- X-chromosomale Hypophosphatämie (Phosphatdiabetes)

**Einschätzung: Nach welcher Zeitspanne wird eine seltene Erkrankung mit orofazialer Manifestation nach erstmaligem Auftreten der Symptome als solche diagnostiziert?**

- innerhalb des 1. Monats
- nach 1-6 Monaten
- nach 6 bis 18 Monaten
- nach 1,5 bis 3 Jahren
- nach mehr als 3 Jahren
- keine Einschätzung

### 3. Konfrontation/Auseinandersetzung mit seltenen Erkrankungen

**Würden Sie sagen, dass Sie sich ausreichend mit seltenen Erkrankungen auskennen?**

Versuchen Sie so spontan und intuitiv wie möglich zu antworten.

>-----<

ja

überhaupt nicht

**Haben Sie schon einmal eine/n Patientin/en mit einer seltenen Erkrankung, die sich orofazial manifestiert, behandelt / ist ein/e solche/r Patient/in schon einmal bei Ihnen vorstellig geworden?**

- ☐ ja
- ☐ nein
- ☐ keine Angabe

**Haben Sie schon einmal bei der Behandlung eines/r Patienten/in gedacht, es könnte eine seltene Erkrankung mit orofazialer Beteiligung vorliegen?**

- ☐ ja
- ☐ nein
- ☐ keine Angabe

**Haben Sie schon einmal eine seltene Erkrankung, die sich orofazial manifestiert, diagnostiziert?**

- ☐ ja, ein Mal
- ☐ ja, mehrmals
- ☐ nein, noch nie
- ☐ keine Angabe

#### **4. Ausbildung und Fort-/Weiterbildung**

**Wurde während Ihrer zahnmedizinischen Ausbildung Zeit darauf verwendet, Wissen über seltene Erkrankungen mit orofazialer Manifestation, ihre Diagnostik und Therapie zu erlangen?**

- ☐ ja, es wurde ausreichend Zeit darauf verwendet
- ☐ ja, aber es wurde zu wenig Zeit darauf verwendet
- ☐ ja
- ☐ nein, daher fehlt es mir jetzt an Wissen bezüglich seltener Erkrankungen mit orofazialer Manifestation
- ☐ nein
- ☐ keine Angabe

**Haben Sie sich bereits bezüglich seltener Erkrankungen mit orofazialer Manifestation fortgebildet?**

- ☐ ja
- ☐ nein, aber ich möchte dies gerne tun
- ☐ nein, es besteht kein Interesse
- ☐ keine Angabe

**Wenn ein/e Patient/in mit bekannter orofazialer Manifestation einer seltenen Erkrankung bei Ihnen vorstellig wird, wissen Sie dann, wo Sie wichtige Informationen zu Diagnostik, Krankheitsverlauf und Therapie erhalten können?**

- ☐ ja
- ☐ nein
- ☐ keine Angabe

**Woher beziehen Sie Ihr Wissen zu seltenen Erkrankungen?**

Mehrere Antworten sind möglich.

- ☐ aus dem Studium
- ☐ aus Fortbildungen
- ☐ aus Fachzeitschriften
- ☐ aus fachspezifischen Online-Portalen
- ☐ von Kollegen
- ☐ keine Angabe

## 5. Informationen zu seltenen Erkrankungen

### Benötigen Sie in Ihrem zahnmedizinischen Alltag Informationen zu seltenen Erkrankungen mit orofazialer Manifestation?

Mehrere Antworten sind möglich.

- ☐ ja
- ☐ ja, aber ich weiß nicht, wo ich diese Informationen erhalten kann
- ☐ ja, aber ich habe leider keine Zeit für die Recherche
- ☐ nein, ich bin ausreichend informiert
- ☐ nein, da ich nicht an Informationen zu seltenen Erkrankungen mit orofazialer Manifestation interessiert bin
- ☐ keine Angabe

### Welche der unten genannten Organisationen, Websites und Informationsquellen zu seltenen Erkrankungen mit orofazialer Manifestation kennen Sie?

Mehrere Antworten sind möglich.

- ☐ ROMSE e.V.
- ☐ Orphanet
- ☐ NAMSE (Nationales Aktionsbündnis für Menschen mit Seltene Erkrankungen)
- ☐ ACHSE e.V. (Allianz Chronischer Seltener Erkrankungen)
- ☐ Keine

### Ich benötige Informationen zu seltenen Erkrankungen mit orofazialer Manifestation bezüglich ...

Mehrere Antworten sind möglich.

- ☐ Inzidenz und Prävalenz
- ☐ Letalität und Mortalität
- ☐ Behandlungsmodalitäten
- ☐ Relevanter Medikationen

### Erachten Sie, als Zahnmediziner, es als wichtig, Kenntnisse zu seltenen Erkrankungen, die sich orofazial manifestieren, zu haben?

Mehrere Antworten sind möglich.

- ☐ ja, ich erachte es als sehr wichtig
- ☐ ja, diese Kenntnisse sind besonders differentialdiagnostisch von Bedeutung
- ☐ man sollte davon gehört haben
- ☐ nein, es ist absolut unwichtig
- ☐ nein, denn seltene Erkrankungen spielen im zahnmedizinischen Berufsalltag so gut wie gar keine Rolle



## Punktesystem und Einteilung in Kategorien

Für jede richtige Antwort, bekannte RD, Informationsquelle oder benötigte Information und die Antwort „ja“ wird 1 Punkt vergeben, für jede falsche Antwort, „nein“, „keine“, „keine Angabe“ oder Auslassen einer Frage werden 0 Punkte vergeben.

Aus der Gesamtpunktzahl ergeben sich für die jeweiligen Abschnitte folgende mögliche Einteilungen in Kategorien:

### Abschnitt 2+3 „Kenntnisse zu Seltenen Erkrankungen“

| Kategorie | Punktzahl    | Bedeutung                  |
|-----------|--------------|----------------------------|
| <b>1</b>  | <b>0-10</b>  | KEINE Kenntnis zu s.E.     |
| <b>2</b>  | <b>11-16</b> | GERINGE Kenntnis zu s.E.   |
| <b>3</b>  | <b>17-22</b> | GUTE Kenntnis zu s.E.      |
| <b>4</b>  | <b>23-28</b> | SEHR GUTE Kenntnis zu s.E. |

### Abschnitt 4 „Ausbildung und Fort-/Weiterbildung“

| Kategorie | Punktzahl   | Bedeutung                                           |
|-----------|-------------|-----------------------------------------------------|
| <b>1</b>  | <b>0- 3</b> | KEINE/GERINGFÜGIGE Ausbildung / Fort-/Weiterbildung |
| <b>2</b>  | <b>4- 6</b> | MÄßIGE Ausbildung / Fort-/Weiterbildung             |
| <b>3</b>  | <b>7-10</b> | GUTE/SEHR GUTE Ausbildung / Fort-/Weiterbildung     |

### Abschnitt 5 „Informationsbedarf zu Seltenen Erkrankungen“

| Kategorie | Punktzahl    | Bedeutung                                |
|-----------|--------------|------------------------------------------|
| <b>1</b>  | <b>0- 5</b>  | GERINGER Bedarf an Informationen zu s.E. |
| <b>2</b>  | <b>6-10</b>  | MÄßIGER Bedarf an Informationen zu s.E.  |
| <b>3</b>  | <b>11-14</b> | GROßER Bedarf an Informationen zu s.E.   |
